# Supplementary material for: Multifunctional Prussian blue analogous@polyaniline core–shell nanocubes for lithium storage and overall water splitting
Source: Royal Society of Chemistry journal article supplement (doi:10.1039/c7ra10292e), 2017-01-01
Supplement: c7ra10292e1.pdf [file c7ra10292e1.pdf]

## **Supporting Information**

### **Multifunctional Prussian Blue Analogous@Polyaniline Core-Shell Nanocubes for Lithium Storage and Overall Water Splitting**

Lu Zhang, Tao Meng, Baoguang Mao, Donglei Guo, Jinwen Qin\* and Minhua Cao\*

Key Laboratory of Cluster Science, Ministry of Education of China, Beijing Key Laboratory of Photoelectronic/Electrophotonic Conversion Materials, School of Chemistry and Chemical Engineering, Beijing Institute of Technology, Beijing, 100081, P. R. China.

\***E-mail:** [caomh@bit.edu.cn](mailto:caomh@bit.edu.cn)

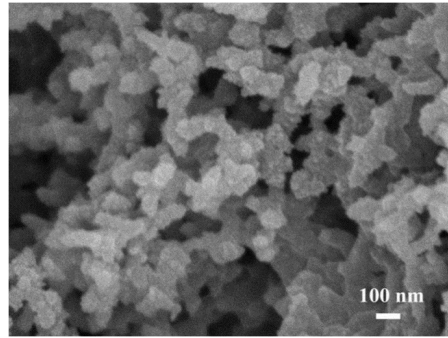

**Fig. S1** FE-SEM image of pure PANI.

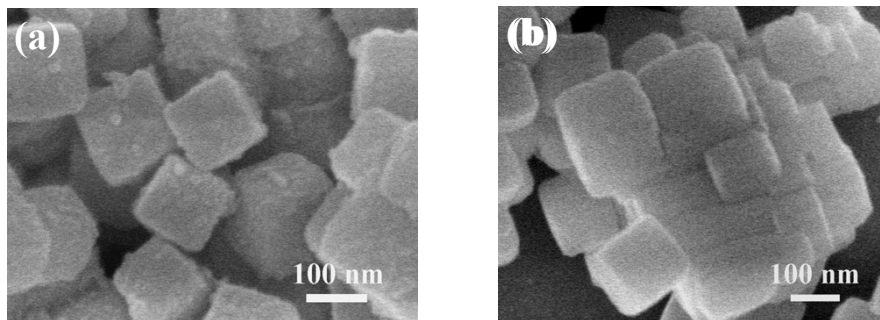

**Fig. S2** FE-SEM images of PBAs@PANI nanocubes (a) and bare PBAs (b) after being heated at 150 °C for 24 h under vacuum condition.

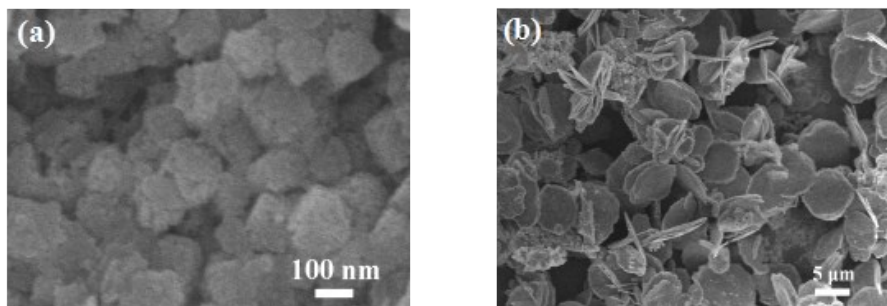

**Fig. S3** FE-SEM images of PBAs@PANI (a) and bare PBAs (b) after being soaked in 1.0 M KOH for 12 h.

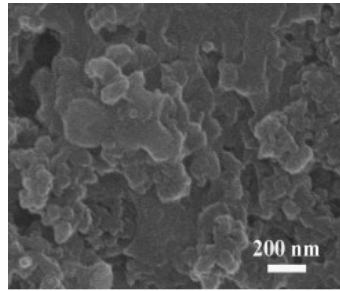

**Fig. S4** FE-SEM images of bare PBAs electrode after being tested for 100 cycles at the current density of  $100 \text{ mA g}^{-1}$ .

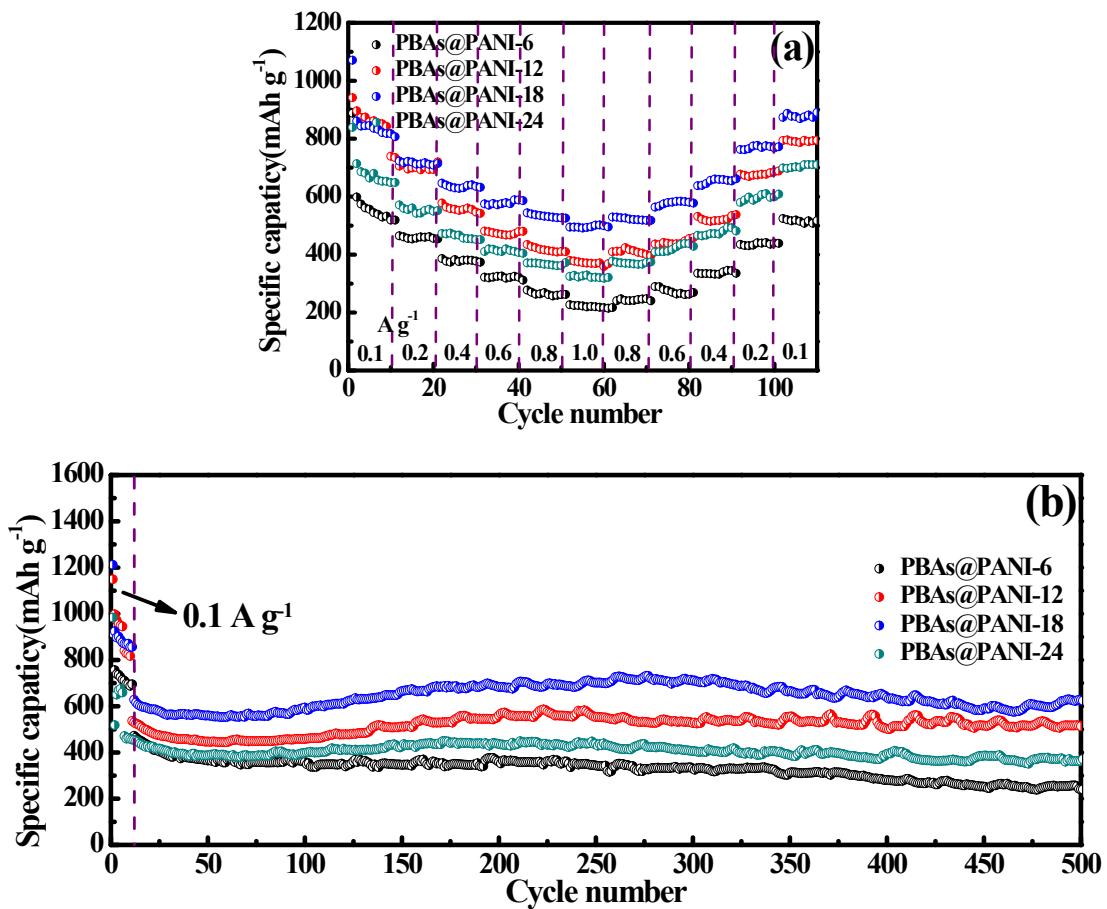

**Fig. S5** Rate performances (a) and long cycling performances (b) for a series of PBAs@PANI at 1  $\text{A g}^{-1}$  after activation at  $100 \text{ mA g}^{-1}$  for initial ten cycles.

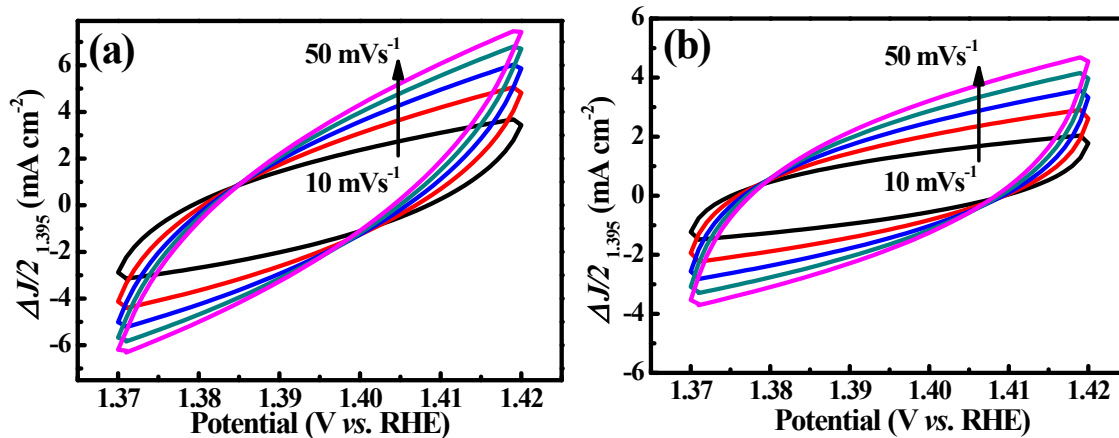

**Fig. S6** Typical CVs tested at the potential range of 1.37-1.42 V vs. RHE with the scan rates increasing from 10 to 50 mV s<sup>-1</sup> for PBAs (a) and PBAs@PANI (b).

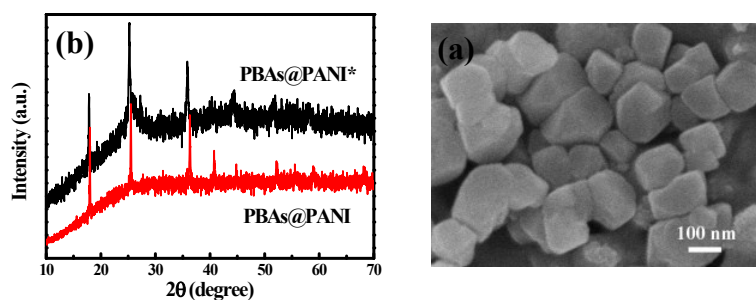

**Fig. S7** (a) XRD patterns for PBAs@PANI before and after OER test. (b) FE-SEM image after OER test for PBAs@PANI.

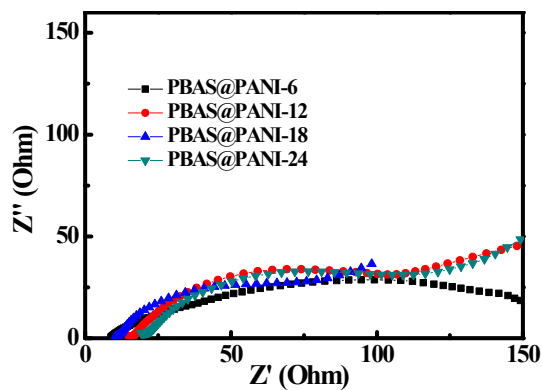

**Fig. S8** EIS curves for a series of PBAs@PANI in O<sub>2</sub>-saturated 1.0 M KOH solution (scan rate of 5 mV s<sup>-1</sup>).
